# Supplementary material for: Preconception Maternal and Paternal Exposure to Persistent Organic Pollutants and Birth Size: The LIFE Study
Source: PubMed Central journal article supplement (PMC4286275; doi:10.1289/ehp.1308016), 2014-08-05
Supplement: ehp.1308016.s001.508.pdf [file ehp.1308016.s001.508.pdf]

## **Supplemental Material**

### **Preconception Maternal and Paternal Exposure to Persistent Organic Pollutants and Birth Size: The LIFE Study**

Candace A. Robledo, Edwina Yeung, Pauline Mendola, Rajeshwari Sundaram, Jose Maisog,

Anne M. Sweeney, Dana Boyd Barr, and Germaine M. Buck Louis

**Table S1.** Geometric means and 95% confidence intervals for untransformed persistent chemical serum concentrations for couples for which a singleton delivery was observed and the standard deviations of the log-transformed persistent chemical serum concentrations used for scaling in analyses, LIFE Study, 2005-2009. 2

**Table S2.** Adjusted mean changes and their 95% confidence intervals for each birth size measure among girls per 1-SD increase in ln-transformed maternal chemical concentrations for all chemicals evaluated, LIFE Study, 2005-2009. 5

**Table S3.** Adjusted mean changes and their 95% confidence intervals for each birth size measure among boys per 1-SD increase in ln-transformed maternal chemical concentrations for all chemicals evaluated, LIFE Study, 2005-2009. 8

**Table S4.** Adjusted mean changes and their 95% confidence intervals for each birth size measure among girls per 1-SD increase in ln-transformed paternal chemical concentrations for all chemicals evaluated, LIFE Study, 2005-2009. 11

**Table S5.** Adjusted mean changes and their 95% confidence intervals for each birth size measure among boys per 1-SD increase in ln-transformed paternal chemical concentrations for all chemicals evaluated, LIFE Study, 2005-2009. 14

**Table S1.** Geometric means (GM) and 95% confidence intervals (CI) for untransformed persistent chemical serum concentrations for couples for which a singleton delivery was observed and the standard deviations (SD) of the log-transformed persistent chemical serum concentrations used for scaling in analyses, LIFE Study, 2005-2009.

| <b>Chemical</b>                                    | <b>Females<br/>GM (95% CI)</b> | <b>Males<br/>GM (95% CI)</b> | <b>Females<br/>SD</b> | <b>Males<br/>SD</b> |
|----------------------------------------------------|--------------------------------|------------------------------|-----------------------|---------------------|
| Polybrominated biphenyl (PBB) (ng/g serum)         |                                |                              |                       |                     |
| 153                                                | 0.008 (0.007-0.009)            | 0.012 (0.010, 0.013)         | 0.0269                | 0.0487              |
| Organochlorine pesticides (OC) (ng/g serum)        |                                |                              |                       |                     |
| Hexachlorobenzene                                  | 0.046 (0.044, 0.049)           | 0.054 (0.051, 0.057)         | 0.0205                | 0.0234              |
| $\beta$ -Hexachlorocyclohexane                     | 0.016 (0.014, 0.018)           | 0.017 (0.015, 0.018)         | 0.0718                | 0.0383              |
| $\gamma$ -Hexachlorocyclohexane (lindane)          | 0.005 (0.004, 0.006)           | 0.006 (0.005, 0.007)         | 0.0020                | 0.0022              |
| <i>o,p'</i> -DDT                                   | 0.002 (0.002, 0.003)           | 0.003 (0.003, 0.003)         | 0.0027                | 0.0025              |
| <i>p,p'</i> -DDT                                   | 0.012 (0.011, 0.013)           | 0.014 (0.013, 0.015)         | 0.0230                | 0.0160              |
| Oxychlorane                                        | 0.035 (0.032, 0.038)           | 0.042 (0.039, 0.045)         | 0.0273                | 0.0388              |
| <i>trans</i> -Nonachlor                            | 0.051 (0.046, 0.055)           | 0.068 (0.062, 0.074)         | 0.0546                | 0.0844              |
| <i>p,p'</i> -DDE                                   | 0.580 (0.534, 0.630)           | 0.752 (0.700, 0.808)         | 0.3024                | 0.2720              |
| Mirex                                              | 0.007 (0.007, 0.008)           | 0.013 (0.011, 0.014)         | 0.0217                | 0.0461              |
| Polybrominated diphenyl ethers (PBDE) (ng/g serum) |                                |                              |                       |                     |
| 17                                                 | 0.001 (0.001, 0.002)           | 0.001 (0.001, 0.002)         | 0.0269                | 0.0038              |
| 28                                                 | 0.010 (0.009, 0.011)           | 0.009 (0.008, 0.011)         | 0.0034                | 0.0148              |
| 47                                                 | 0.116 (0.101, 0.132)           | 0.113 (0.099, 0.130)         | 0.0166                | 0.2016              |
| 66                                                 | 0.001 (0.001, 0.001)           | 0.001 (0.001, 0.002)         | 0.0023                | 0.0033              |
| 85                                                 | 0.003 (0.002, 0.003)           | 0.002 (0.002, 0.003)         | 0.0074                | 0.0089              |
| 99                                                 | 0.020 (0.018, 0.024)           | 0.022 (0.019, 0.025)         | 0.0677                | 0.0806              |
| 100                                                | 0.024 (0.021, 0.028)           | 0.025 (0.021, 0.029)         | 0.0718                | 0.0872              |
| 153                                                | 0.047 (0.041, 0.054)           | 0.071 (0.006, 0.084)         | 0.1328                | 0.2165              |
| 154                                                | 0.003 (0.002, 0.003)           | 0.003 (0.002, 0.003)         | 0.0071                | 0.0101              |
| 183                                                | 0.002 (0.001, 0.002)           | 0.002 (0.002, 0.002)         | 0.0022                | 0.0027              |

| <b>Chemical</b>                              | <b>Females<br/>GM (95% CI)</b> | <b>Males<br/>GM (95% CI)</b> | <b>Females<br/>SD</b> | <b>Males<br/>SD</b> |
|----------------------------------------------|--------------------------------|------------------------------|-----------------------|---------------------|
| Polychlorinated biphenyls (PCB) (ng/g serum) |                                |                              |                       |                     |
| 28                                           | 0.006 (0.005, 0.007)           | 0.005 (0.005, 0.006)         | 0.1201                | 0.1441              |
| 44                                           | 0.002 (0.002, 0.002)           | 0.002 (0.002, 0.002)         | 0.0155                | 0.0149              |
| 49                                           | 0.001 (0.000, 0.001)           | 0.001 (0.000, 0.001)         | 0.0060                | 0.0074              |
| 52                                           | 0.001 (0.001, 0.001)           | 0.001 (0.001, 0.001)         | 0.0151                | 0.0188              |
| 66                                           | 0.003 (0.003, 0.003)           | 0.003 (0.002, 0.003)         | 0.0324                | 0.0339              |
| 74                                           | 0.014 (0.013, 0.015)           | 0.014 (0.013, 0.015)         | 0.0280                | 0.0352              |
| 87                                           | 0.001 (0.001, 0.002)           | 0.002 (0.001, 0.002)         | 0.0013                | 0.0018              |
| 99                                           | 0.010 (0.010, 0.011)           | 0.012 (0.011, 0.013)         | 0.0091                | 0.0162              |
| 101                                          | 0.002 (0.002, 0.002)           | 0.003 (0.003, 0.003)         | 0.0043                | 0.0055              |
| 105                                          | 0.004 (0.004, 0.004)           | 0.004 (0.004, 0.004)         | 0.0035                | 0.0070              |
| 110                                          | 0.001 (0.001, 0.002)           | 0.001 (0.001, 0.002)         | 0.0020                | 0.0022              |
| 114                                          | 0.002 (0.001, 0.002)           | 0.002 (0.001, 0.002)         | 0.0014                | 0.0015              |
| 118                                          | 0.017 (0.016, 0.018)           | 0.018 (0.017, 0.019)         | 0.0139                | 0.0250              |
| 128                                          | 0.003 (0.002, 0.004)           | 0.002 (0.002, 0.003)         | 0.0008                | 0.0014              |
| 138                                          | 0.032 (0.029, 0.034)           | 0.038 (0.035, 0.042)         | 0.0285                | 0.0390              |
| 146                                          | 0.006 (0.005, 0.006)           | 0.008 (0.007, 0.008)         | 0.0055                | 0.0082              |
| 149                                          | 0.001 (0.001, 0.002)           | 0.001 (0.001, 0.002)         | 0.0046                | 0.0064              |
| 151                                          | 0.002 (0.001, 0.002)           | 0.002 (0.001, 0.003)         | 0.0058                | 0.0075              |
| 153                                          | 0.044 (0.041, 0.048)           | 0.058 (0.054, 0.063)         | 0.0386                | 0.0520              |
| 156                                          | 0.006 (0.006, 0.007)           | 0.008 (0.007, 0.008)         | 0.0060                | 0.0072              |
| 157                                          | 0.002 (0.002, 0.002)           | 0.002 (0.002, 0.003)         | 0.0018                | 0.0019              |
| 167                                          | 0.003 (0.003, 0.004)           | 0.003 (0.003, 0.003)         | 0.0021                | 0.0021              |
| 170                                          | 0.013 (0.012, 0.014)           | 0.018 (0.016, 0.019)         | 0.0114                | 0.0172              |
| 172                                          | 0.002 (0.002, 0.003)           | 0.003 (0.003, 0.004)         | 0.0019                | 0.0031              |
| 177                                          | 0.003 (0.003, 0.003)           | 0.004 (0.003, 0.004)         | 0.0052                | 0.0085              |
| 178                                          | 0.003 (0.003, 0.004)           | 0.004 (0.004, 0.005)         | 0.0032                | 0.0050              |
| 180                                          | 0.032 (0.029, 0.034)           | 0.046 (0.042, 0.05)          | 0.0276                | 0.0425              |
| 183                                          | 0.005 (0.004, 0.005)           | 0.006 (0.005, 0.006)         | 0.0063                | 0.0091              |
| 187                                          | 0.011 (0.01, 0.012)            | 0.015 (0.014, 0.017)         | 0.0140                | 0.0223              |

| <b>Chemical</b>                                  | <b>Females<br/>GM (95% CI)</b> | <b>Males<br/>GM (95% CI)</b> | <b>Females<br/>SD</b> | <b>Males<br/>SD</b> |
|--------------------------------------------------|--------------------------------|------------------------------|-----------------------|---------------------|
| 189                                              | 0.001 (0.001, 0.001)           | 0.002 (0.001, 0.002)         | 0.0007                | 0.0011              |
| 194                                              | 0.008 (0.007, 0.008)           | 0.011 (0.010, 0.012)         | 0.0065                | 0.0152              |
| 195                                              | 0.003 (0.002, 0.003)           | 0.003 (0.003, 0.004)         | 0.0020                | 0.0036              |
| 196                                              | 0.008 (0.007, 0.008)           | 0.011 (0.010, 0.012)         | 0.0073                | 0.0160              |
| 201                                              | 0.007 (0.007, 0.008)           | 0.011 (0.009, 0.012)         | 0.0078                | 0.0205              |
| 206                                              | 0.004 (0.004, 0.004)           | 0.006 (0.005, 0.006)         | 0.0037                | 0.0099              |
| 209                                              | 0.002 (0.002, 0.002)           | 0.003 (0.003, 0.003)         | 0.0014                | 0.0028              |
| Perfluoroalkyl chemicals (PFC) (ng/ml)           |                                |                              |                       |                     |
| 2-(N-ethyl-perfluorooctane sulfonamido) acetate  | 0.109 (0.102, 0.116)           | 0.105 (0.100, 0.11)          | 0.0503                | 0.0457              |
| 2-(N-methyl-perfluorooctane sulfonamido) acetate | 0.301 (0.270, 0.336)           | 0.324 (0.291, 0.361)         | 0.2460                | 0.2601              |
| Perfluorodecanoate                               | 0.402 (0.370, 0.437)           | 0.458 (0.425, 0.494)         | 0.2100                | 0.2085              |
| Perfluorononanoate                               | 1.211 (1.127, 1.301)           | 1.566 (1.462, 1.677)         | 0.3139                | 0.3187              |
| Perfluorooctane sulfonamide                      | 0.112 (0.100, 0.125)           | 0.114 (0.103, 0.125)         | 0.0351                | 0.0438              |
| Perfluorooctane sulfonate                        | 12.44 (11.50, 13.44)           | 21.6 (19.97, 23.39)          | 0.5506                | 0.5674              |
| Perfluorooctanoate                               | 3.16 (2.92, 3.42)              | 5.00 (4.70, 5.32)            | 0.4348                | 0.3913              |

**Table S2.** Adjusted<sup>a</sup> mean changes ( $\beta$ ) and their 95% confidence intervals for each birth size measure among girls per 1-SD increase in ln-transformed maternal chemical concentrations for all chemicals evaluated, LIFE Study, 2005-2009.

| <b>Chemical</b>         | <b>Birth weight<sup>b</sup><br/>(grams)</b> | <b>Head circumference<sup>c</sup><br/>(cm)</b> | <b>Length<sup>d</sup><br/>(cm)</b> | <b>Ponderal Index<sup>d</sup><br/>(g/cm<sup>3</sup>)</b> |
|-------------------------|---------------------------------------------|------------------------------------------------|------------------------------------|----------------------------------------------------------|
| PBB 153                 | 18.72 (-64.45, 101.90)                      | -0.37 (-0.84, 0.11)                            | 0.41 (-0.07, 0.90)                 | -0.05 (-0.11, 0.01)                                      |
| HCH                     | -1.87 (-117.19, 113.46)                     | 0.10 (-0.40, 0.61)                             | -0.23 (-0.91, 0.46)                | 0.02 (-0.06, 0.10)                                       |
| $\beta$ -HCH            | -117.92 (-335.25, 99.42)                    | -1.47 (-2.33, -0.61)                           | -0.33 (-1.61, 0.95)                | -0.05 (-0.20, 0.11)                                      |
| $\gamma$ -HCH (lindane) | 1.14 (-93.68, 95.97)                        | 0.03 (-0.37, 0.42)                             | -0.59 (-1.14, -0.03)               | 0.09 (0.03, 0.16)                                        |
| <i>o,p'</i> -DDT        | -195.39 (-351.25, -39.52)                   | -0.78 (-1.48, -0.09)                           | -0.76 (-1.68, 0.16)                | -0.03 (-0.14, 0.08)                                      |
| <i>p,p'</i> -DDT        | -134.91 (-406.39, 136.57)                   | -1.11 (-2.30, 0.08)                            | -1.16 (-2.75, 0.43)                | 0.08 (-0.11, 0.26)                                       |
| Oxychlorthane           | -21.48 (-108.40, 65.44)                     | -0.14 (-0.60, 0.32)                            | -0.28 (-0.79, 0.23)                | 0.03 (-0.03, 0.09)                                       |
| <i>trans</i> -Nonachlor | -5.72 (-85.08, 73.63)                       | -0.11 (-0.57, 0.34)                            | -0.20 (-0.66, 0.27)                | 0.02 (-0.03, 0.08)                                       |
| <i>p,p'</i> -DDE        | 4.69 (-140.37, 149.74)                      | -0.42 (-1.07, 0.24)                            | -0.12 (-0.97, 0.74)                | 0.03 (-0.07, 0.13)                                       |
| Mirex                   | -68.31 (-275.12, 138.49)                    | -0.12 (-1.02, 0.78)                            | 0.04 (-1.18, 1.26)                 | -0.06 (-0.21, 0.08)                                      |
| PBDE-17                 | -79.18 (-258.11, 99.75)                     | -0.50 (-1.41, 0.40)                            | 0.02 (-1.08, 1.13)                 | -0.06 (-0.21, 0.08)                                      |
| PBDE-28                 | -151.33 (-298.56, -4.10)                    | -1.05 (-1.73, -0.38)                           | -1.14 (-2.00, -0.28)               | 0.05 (-0.05, 0.16)                                       |
| PBDE-47                 | -98.91 (-269.83, 72.01)                     | -0.31 (-1.23, 0.61)                            | -0.91 (-1.90, 0.07)                | 0.06 (-0.06, 0.18)                                       |
| PBDE-66                 | -21.98 (-141.29, 97.33)                     | -0.17 (-0.76, 0.41)                            | -0.41 (-1.11, 0.29)                | 0.05 (-0.04, 0.14)                                       |
| PBDE-85                 | 14.17 (-186.13, 214.47)                     | 0.34 (-0.78, 1.45)                             | 0.14 (-1.05, 1.34)                 | -0.02 (-0.17, 0.13)                                      |
| PBDE-99                 | 52.08 (-120.80, 224.96)                     | 0.27 (-0.48, 1.02)                             | 0.25 (-0.76, 1.27)                 | -0.01 (-0.13, 0.12)                                      |
| PBDE-100                | -89.66 (-220.08, 40.75)                     | -0.43 (-1.11, 0.25)                            | -0.68 (-1.45, 0.08)                | 0.04 (-0.06, 0.13)                                       |
| PBDE-153                | -22.92 (-114.53, 68.68)                     | -0.29 (-0.68, 0.11)                            | -0.25 (-0.78, 0.29)                | 0.02 (-0.04, 0.09)                                       |
| PBDE-154                | 1.51 (-196.27, 199.28)                      | 0.27 (-0.82, 1.36)                             | 0.20 (-0.81, 1.22)                 | -0.03 (-0.17, 0.11)                                      |
| PBDE-183                | -84.60 (-154.39, -14.82)                    | -0.27 (-0.58, 0.04)                            | -0.20 (-0.61, 0.21)                | -0.04 (-0.08, 0.01)                                      |
| PCB-28                  | -1863.11 (-3746.90, 20.68)                  | -6.31 (-15.27, 2.65)                           | -8.82 (-19.95, 2.31)               | -0.18 (-1.50, 1.14)                                      |
| PCB-44                  | -243.78 (-1395.09, 907.53)                  | 0.82 (-3.84, 5.49)                             | -2.30 (-7.76, 3.15)                | 0.15 (-0.59, 0.89)                                       |
| PCB-49                  | 81.32 (-727.04, 889.67)                     | 1.27 (-2.44, 4.98)                             | -0.70 (-5.21, 3.81)                | 0.20 (-0.32, 0.73)                                       |
| PCB-52                  | 57.54 (-977.11, 1092.20)                    | 2.34 (-2.54, 7.21)                             | -1.97 (-8.13, 4.19)                | 0.40 (-0.33, 1.12)                                       |
| PCB-66                  | -705.93 (-1815.74, 403.88)                  | -5.51 (-11.20, 0.17)                           | -6.05 (-12.57, 0.46)               | 0.40 (-0.37, 1.17)                                       |
| PCB-74                  | -100.48 (-381.23, 180.28)                   | 0.11 (-1.15, 1.37)                             | -0.35 (-2.01, 1.31)                | -0.01 (-0.21, 0.19)                                      |

| <b>Chemical</b> | <b>Birth weight<sup>b</sup><br/>(grams)</b> | <b>Head circumference<sup>c</sup><br/>(cm)</b> | <b>Length<sup>d</sup><br/>(cm)</b> | <b>Ponderal Index<sup>d</sup><br/>(g/cm<sup>3</sup>)</b> |
|-----------------|---------------------------------------------|------------------------------------------------|------------------------------------|----------------------------------------------------------|
| PCB-87          | 18.55 (-105.13, 142.22)                     | 0.25 (-0.43, 0.93)                             | -0.34 (-1.06, 0.39)                | 0.06 (-0.03, 0.14)                                       |
| PCB-99          | -13.74 (-110.24, 82.76)                     | -0.04 (-0.48, 0.40)                            | -0.02 (-0.64, 0.61)                | 0.00 (-0.08, 0.07)                                       |
| PCB-101         | 93.69 (-19.89, 207.27)                      | 0.24 (-0.29, 0.76)                             | 0.32 (-0.36, 1.00)                 | 0.02 (-0.06, 0.10)                                       |
| PCB-105         | 7.70 (-76.30, 91.71)                        | 0.00 (-0.38, 0.38)                             | 0.05 (-0.44, 0.54)                 | 0.00 (-0.06, 0.06)                                       |
| PCB-110         | 64.06 (-37.40, 165.53)                      | 0.17 (-0.29, 0.62)                             | 0.37 (-0.24, 0.97)                 | -0.01 (-0.08, 0.06)                                      |
| PCB-114         | -6.53 (-88.05, 74.99)                       | 0.02 (-0.34, 0.38)                             | 0.08 (-0.40, 0.56)                 | -0.01 (-0.07, 0.04)                                      |
| PCB-118         | -5.37 (-94.73, 84.00)                       | -0.05 (-0.46, 0.36)                            | -0.09 (-0.61, 0.44)                | 0.01 (-0.05, 0.07)                                       |
| PCB-128         | 13.66 (-68.49, 95.81)                       | 0.08 (-0.30, 0.45)                             | -0.13 (-0.61, 0.36)                | 0.03 (-0.03, 0.09)                                       |
| PCB-138         | -82.30 (-219.22, 54.61)                     | -0.65 (-1.25, -0.05)                           | 0.23 (-0.58, 1.04)                 | -0.10 (-0.20, -0.01)                                     |
| PCB-146         | -42.22 (-179.65, 95.20)                     | -0.28 (-0.92, 0.36)                            | 0.10 (-0.76, 0.95)                 | -0.04 (-0.14, 0.06)                                      |
| PCB-149         | 34.35 (-43.22, 111.92)                      | 0.02 (-0.31, 0.36)                             | 0.18 (-0.28, 0.64)                 | 0.00 (-0.06, 0.05)                                       |
| PCB-151         | 31.68 (-46.02, 109.37)                      | 0.04 (-0.29, 0.37)                             | 0.20 (-0.26, 0.66)                 | -0.01 (-0.06, 0.05)                                      |
| PCB-153         | -90.94 (-240.89, 59.01)                     | -0.65 (-1.30, 0.01)                            | -0.02 (-0.92, 0.87)                | -0.06 (-0.17, 0.04)                                      |
| PCB-156         | -12.26 (-114.71, 90.19)                     | -0.20 (-0.64, 0.25)                            | 0.29 (-0.31, 0.90)                 | -0.04 (-0.11, 0.03)                                      |
| PCB-157         | -14.96 (-108.02, 78.09)                     | -0.22 (-0.62, 0.18)                            | 0.14 (-0.41, 0.70)                 | -0.03 (-0.09, 0.04)                                      |
| PCB-167         | -61.69 (-172.52, 49.15)                     | -0.04 (-0.55, 0.46)                            | -0.47 (-1.12, 0.19)                | 0.02 (-0.06, 0.10)                                       |
| PCB-170         | -80.87 (-223.93, 62.18)                     | -0.42 (-1.06, 0.22)                            | 0.28 (-0.57, 1.13)                 | -0.10 (-0.20, 0.00)                                      |
| PCB-172         | 68.59 (-48.81, 185.99)                      | 0.09 (-0.42, 0.61)                             | 0.65 (-0.04, 1.34)                 | -0.05 (-0.13, 0.03)                                      |
| PCB-177         | 50.44 (-44.76, 145.64)                      | 0.03 (-0.37, 0.43)                             | 0.40 (-0.16, 0.96)                 | -0.03 (-0.09, 0.04)                                      |
| PCB-178         | 8.57 (-105.86, 123.01)                      | -0.18 (-0.67, 0.32)                            | 0.15 (-0.53, 0.83)                 | -0.02 (-0.10, 0.06)                                      |
| PCB-180         | -36.80 (-180.04, 106.44)                    | -0.21 (-0.84, 0.42)                            | 0.19 (-0.65, 1.04)                 | -0.06 (-0.16, 0.05)                                      |
| PCB-183         | 25.06 (-79.50, 129.62)                      | -0.13 (-0.57, 0.31)                            | 0.17 (-0.45, 0.79)                 | -0.01 (-0.09, 0.06)                                      |
| PCB-187         | 49.94 (-62.50, 162.37)                      | 0.09 (-0.39, 0.57)                             | 0.33 (-0.33, 1.00)                 | -0.02 (-0.10, 0.06)                                      |
| PCB-189         | -12.35 (-117.21, 92.51)                     | -0.20 (-0.69, 0.30)                            | -0.20 (-0.82, 0.42)                | 0.03 (-0.04, 0.11)                                       |
| PCB-194         | 44.94 (-70.66, 160.54)                      | 0.26 (-0.24, 0.76)                             | 0.15 (-0.54, 0.83)                 | 0.02 (-0.06, 0.10)                                       |
| PCB-195         | -18.46 (-128.10, 91.18)                     | 0.13 (-0.34, 0.61)                             | 0.03 (-0.62, 0.68)                 | -0.03 (-0.11, 0.05)                                      |
| PCB-196         | 37.27 (-69.43, 143.97)                      | 0.32 (-0.13, 0.77)                             | 0.29 (-0.34, 0.92)                 | -0.02 (-0.09, 0.06)                                      |
| PCB-201         | 72.96 (-28.37, 174.30)                      | 0.51 (0.08, 0.93)                              | 0.19 (-0.41, 0.79)                 | 0.03 (-0.04, 0.10)                                       |
| PCB-206         | 71.82 (-26.87, 170.52)                      | 0.52 (0.06, 0.98)                              | 0.21 (-0.38, 0.79)                 | 0.03 (-0.04, 0.10)                                       |

| <b>Chemical</b> | <b>Birth weight<sup>b</sup><br/>(grams)</b> | <b>Head circumference<sup>c</sup><br/>(cm)</b> | <b>Length<sup>d</sup><br/>(cm)</b> | <b>Ponderal Index<sup>d</sup><br/>(g/cm<sup>3</sup>)</b> |
|-----------------|---------------------------------------------|------------------------------------------------|------------------------------------|----------------------------------------------------------|
| PCB-209         | -24.96 (-135.66, 85.74)                     | 0.01 (-0.48, 0.51)                             | -0.26 (-0.92, 0.39)                | 0.02 (-0.06, 0.10)                                       |
| Et-PFOSA-AcOH   | -43.58 (-148.14, 60.99)                     | -0.22 (-0.70, 0.26)                            | 0.35 (-0.25, 0.95)                 | -0.09 (-0.16, -0.02)                                     |
| Me-PFOSA-AcOH   | -13.47 (-107.09, 80.15)                     | -0.07 (-0.48, 0.34)                            | 0.06 (-0.49, 0.61)                 | -0.01 (-0.08, 0.05)                                      |
| PFDeA           | -53.42 (-161.01, 54.17)                     | -0.13 (-0.59, 0.33)                            | 0.02 (-0.61, 0.65)                 | -0.05 (-0.13, 0.02)                                      |
| PFNA            | -10.08 (-111.46, 91.29)                     | 0.09 (-0.36, 0.54)                             | -0.22 (-0.83, 0.38)                | 0.01 (-0.06, 0.08)                                       |
| PFOSA           | -8.80 (-93.55, 75.95)                       | -0.09 (-0.45, 0.28)                            | 0.34 (-0.16, 0.84)                 | -0.05 (-0.11, 0.01)                                      |
| PFOS            | 14.16 (-81.83, 110.15)                      | -0.04 (-0.46, 0.38)                            | 0.30 (-0.26, 0.86)                 | -0.03 (-0.10, 0.03)                                      |
| PFOA            | -61.64 (-159.15, 35.87)                     | -0.18 (-0.59, 0.23)                            | -0.17 (-0.74, 0.40)                | -0.02 (-0.09, 0.04)                                      |

<sup>a</sup>Models are adjusted for maternal and paternal serum lipids, serum cotinine, BMI (kg/m<sup>2</sup>), maternal age, difference in parental age, infant gender, the individual and partner sum of remaining chemical concentrations in each chemical's respective class. <sup>b</sup>Data for 113 boys and 117 girls were available for analysis. <sup>c</sup>Data for 90 boys and 91 girls were available for analysis. <sup>d</sup>Data for 113 boys and 116 girls were available for analysis

**Table S3.** Adjusted<sup>a</sup> mean changes ( $\beta$ ) and their 95% confidence intervals for each birth size measure among boys per 1-SD increase in ln-transformed maternal chemical concentrations for all chemicals evaluated, LIFE Study, 2005-2009.

| <b>Chemical</b>         | <b>Birth weight<sup>b</sup><br/>(grams)</b> | <b>Head circumference<sup>c</sup><br/>(cm)</b> | <b>Length<sup>d</sup><br/>(cm)</b> | <b>Ponderal Index<sup>d</sup><br/>(g/cm<sup>3</sup>)</b> |
|-------------------------|---------------------------------------------|------------------------------------------------|------------------------------------|----------------------------------------------------------|
| PBB 153                 | -28.90 (-116.58, 58.78)                     | 0.02 (-0.63, 0.68)                             | 0.04 (-0.47, 0.55)                 | -0.03 (-0.09, 0.03)                                      |
| HCH                     | 25.36 (-63.36, 114.07)                      | 0.44 (0.01, 0.87)                              | 0.24 (-0.28, 0.77)                 | -0.03 (-0.09, 0.03)                                      |
| $\beta$ -HCH            | 22.95 (-58.31, 104.21)                      | -0.22 (-0.58, 0.14)                            | 0.23 (-0.27, 0.73)                 | -0.02 (-0.08, 0.05)                                      |
| $\gamma$ -HCH (lindane) | 54.07 (-31.91, 140.05)                      | 0.33 (-0.03, 0.70)                             | 0.34 (-0.17, 0.84)                 | -0.01 (-0.07, 0.05)                                      |
| <i>o,p'</i> -DDT        | -6.11 (-93.02, 80.80)                       | -0.06 (-0.47, 0.35)                            | 0.13 (-0.39, 0.65)                 | -0.02 (-0.08, 0.04)                                      |
| <i>p,p'</i> -DDT        | 3.43 (-85.54, 92.40)                        | -0.06 (-0.49, 0.36)                            | 0.08 (-0.45, 0.61)                 | -0.01 (-0.07, 0.05)                                      |
| Oxychlorane             | -3.52 (-99.84, 92.81)                       | -0.17 (-0.61, 0.26)                            | 0.30 (-0.26, 0.87)                 | -0.05 (-0.12, 0.01)                                      |
| <i>trans</i> -Nonachlor | 3.92 (-100.89, 108.74)                      | -0.12 (-0.63, 0.39)                            | 0.21 (-0.41, 0.82)                 | -0.04 (-0.11, 0.03)                                      |
| <i>p,p'</i> -DDE        | 55.59 (-42.16, 153.34)                      | 0.15 (-0.36, 0.65)                             | 0.25 (-0.31, 0.80)                 | 0.03 (-0.04, 0.09)                                       |
| Mirex                   | 2.15 (-61.46, 65.77)                        | -0.06 (-0.33, 0.22)                            | -0.05 (-0.42, 0.33)                | 0.01 (-0.04, 0.05)                                       |
| PBDE-17                 | 52.41 (-33.62, 138.44)                      | 0.20 (-0.18, 0.58)                             | 0.31 (-0.21, 0.82)                 | -0.01 (-0.07, 0.05)                                      |
| PBDE-28                 | -64.65 (-164.92, 35.63)                     | -0.24 (-0.67, 0.19)                            | -0.18 (-0.76, 0.41)                | -0.03 (-0.10, 0.04)                                      |
| PBDE-47                 | -12.33 (-168.93, 144.27)                    | 0.30 (-0.53, 1.13)                             | -0.31 (-1.20, 0.59)                | 0.03 (-0.09, 0.14)                                       |
| PBDE-66                 | 125.04 (18.16, 231.92)                      | 0.60 (0.02, 1.18)                              | 0.52 (-0.11, 1.15)                 | 0.02 (-0.06, 0.10)                                       |
| PBDE-85                 | 113.87 (-46.51, 274.25)                     | 1.04 (0.04, 2.03)                              | 0.63 (-0.35, 1.61)                 | -0.02 (-0.15, 0.10)                                      |
| PBDE-99                 | 133.29 (9.21, 257.37)                       | 0.91 (0.23, 1.60)                              | 0.76 (0.04, 1.48)                  | -0.02 (-0.11, 0.07)                                      |
| PBDE-100                | -39.25 (-199.22, 120.73)                    | -0.06 (-0.80, 0.67)                            | -0.50 (-1.43, 0.43)                | 0.04 (-0.07, 0.16)                                       |
| PBDE-153                | -13.23 (-115.58, 89.11)                     | -0.15 (-0.60, 0.29)                            | -0.34 (-0.93, 0.26)                | 0.05 (-0.02, 0.13)                                       |
| PBDE-154                | 93.34 (-91.29, 277.96)                      | 1.01 (-0.34, 2.36)                             | 0.67 (-0.29, 1.63)                 | -0.03 (-0.16, 0.10)                                      |
| PBDE-183                | 85.21 (-32.32, 202.74)                      | 0.25 (-0.47, 0.97)                             | 0.55 (-0.15, 1.25)                 | -0.02 (-0.11, 0.06)                                      |
| PCB-28                  | 34.48 (-36.72, 105.68)                      | 0.14 (-0.16, 0.44)                             | -0.09 (-0.51, 0.33)                | 0.04 (-0.01, 0.09)                                       |
| PCB-44                  | 32.46 (-40.00, 104.91)                      | 0.16 (-0.15, 0.47)                             | -0.10 (-0.53, 0.32)                | 0.04 (-0.01, 0.09)                                       |
| PCB-49                  | 34.99 (-37.18, 107.17)                      | 0.16 (-0.15, 0.47)                             | -0.11 (-0.53, 0.31)                | 0.05 (0.00, 0.10)                                        |
| PCB-52                  | 38.39 (-33.58, 110.36)                      | 0.18 (-0.12, 0.48)                             | -0.10 (-0.53, 0.32)                | 0.05 (0.00, 0.10)                                        |
| PCB-66                  | 35.19 (-37.30, 107.67)                      | 0.11 (-0.20, 0.41)                             | -0.12 (-0.55, 0.30)                | 0.05 (0.00, 0.10)                                        |
| PCB-74                  | 34.84 (-41.22, 110.90)                      | 0.17 (-0.15, 0.49)                             | -0.06 (-0.51, 0.39)                | 0.04 (-0.01, 0.09)                                       |



| <b>Chemical</b> | <b>Birth weight<sup>b</sup><br/>(grams)</b> | <b>Head circumference<sup>c</sup><br/>(cm)</b> | <b>Length<sup>d</sup><br/>(cm)</b> | <b>Ponderal Index<sup>d</sup><br/>(g/cm<sup>3</sup>)</b> |
|-----------------|---------------------------------------------|------------------------------------------------|------------------------------------|----------------------------------------------------------|
| PCB-87          | 22.27 (-56.95, 101.49)                      | 0.03 (-0.34, 0.39)                             | -0.06 (-0.53, 0.40)                | 0.02 (-0.03, 0.08)                                       |
| PCB-99          | 7.49 (-112.41, 127.40)                      | -0.01 (-0.53, 0.52)                            | 0.01 (-0.71, 0.73)                 | 0.00 (-0.09, 0.09)                                       |
| PCB-101         | 104.90 (-2.78, 212.57)                      | 0.20 (-0.29, 0.69)                             | 0.11 (-0.53, 0.75)                 | 0.06 (-0.02, 0.14)                                       |
| PCB-105         | 47.30 (-76.53, 171.12)                      | -0.14 (-0.76, 0.48)                            | 0.35 (-0.36, 1.06)                 | -0.02 (-0.11, 0.07)                                      |
| PCB-110         | 48.93 (-38.88, 136.75)                      | 0.00 (-0.42, 0.42)                             | 0.05 (-0.47, 0.57)                 | 0.03 (-0.04, 0.09)                                       |
| PCB-114         | -29.04 (-154.35, 96.28)                     | -0.05 (-0.62, 0.51)                            | 0.45 (-0.29, 1.18)                 | -0.09 (-0.17, 0.00)                                      |
| PCB-118         | -22.98 (-153.65, 107.69)                    | -0.23 (-0.83, 0.37)                            | 0.01 (-0.76, 0.77)                 | -0.02 (-0.11, 0.07)                                      |
| PCB-128         | -17.92 (-193.28, 157.43)                    | -0.86 (-1.67, -0.06)                           | 0.23 (-0.80, 1.26)                 | -0.05 (-0.18, 0.07)                                      |
| PCB-138         | -149.61 (-285.16, -14.06)                   | -0.67 (-1.27, -0.08)                           | 0.02 (-0.78, 0.83)                 | -0.13 (-0.23, -0.04)                                     |
| PCB-146         | -120.50 (-249.74, 8.73)                     | -0.37 (-1.01, 0.27)                            | -0.30 (-1.09, 0.50)                | -0.05 (-0.14, 0.04)                                      |
| PCB-149         | 209.21 (-138.76, 557.18)                    | -1.22 (-3.31, 0.88)                            | 0.33 (-1.72, 2.39)                 | 0.10 (-0.15, 0.34)                                       |
| PCB-151         | 112.45 (-170.76, 395.65)                    | -1.99 (-5.31, 1.33)                            | 0.36 (-1.31, 2.03)                 | 0.02 (-0.18, 0.22)                                       |
| PCB-153         | -169.93 (-317.32, -22.53)                   | -0.78 (-1.45, -0.10)                           | -0.25 (-1.14, 0.64)                | -0.10 (-0.20, 0.01)                                      |
| PCB-156         | -81.32 (-194.40, 31.76)                     | -0.19 (-0.72, 0.34)                            | -0.02 (-0.70, 0.65)                | -0.05 (-0.13, 0.03)                                      |
| PCB-157         | -63.79 (-169.53, 41.94)                     | -0.17 (-0.66, 0.32)                            | -0.04 (-0.66, 0.59)                | -0.04 (-0.12, 0.03)                                      |
| PCB-167         | -129.24 (-228.16, -30.31)                   | -0.47 (-0.95, 0.00)                            | -0.42 (-1.00, 0.16)                | -0.03 (-0.10, 0.04)                                      |
| PCB-170         | -153.69 (-288.45, -18.92)                   | -0.41 (-1.03, 0.21)                            | -0.10 (-0.90, 0.70)                | -0.10 (-0.20, -0.01)                                     |
| PCB-172         | -37.21 (-148.16, 73.74)                     | -0.19 (-0.70, 0.33)                            | 0.34 (-0.31, 0.99)                 | -0.09 (-0.17, -0.02)                                     |
| PCB-177         | -10.24 (-202.93, 182.46)                    | -0.49 (-1.47, 0.50)                            | 0.67 (-0.47, 1.80)                 | -0.13 (-0.26, 0.01)                                      |
| PCB-178         | -47.14 (-167.33, 73.04)                     | -0.42 (-0.95, 0.10)                            | 0.07 (-0.65, 0.79)                 | -0.05 (-0.14, 0.03)                                      |
| PCB-180         | -124.51 (-262.88, 13.85)                    | -0.31 (-0.93, 0.31)                            | -0.17 (-0.99, 0.65)                | -0.07 (-0.17, 0.02)                                      |
| PCB-183         | -78.43 (-230.70, 73.84)                     | -0.45 (-1.13, 0.22)                            | -0.04 (-0.94, 0.86)                | -0.07 (-0.18, 0.04)                                      |
| PCB-187         | -50.03 (-188.34, 88.29)                     | -0.31 (-0.97, 0.35)                            | 0.03 (-0.79, 0.85)                 | -0.05 (-0.15, 0.04)                                      |
| PCB-189         | -25.09 (-106.28, 56.11)                     | -0.02 (-0.37, 0.33)                            | -0.04 (-0.52, 0.44)                | -0.02 (-0.07, 0.04)                                      |
| PCB-194         | -26.95 (-134.87, 80.97)                     | 0.09 (-0.39, 0.58)                             | -0.03 (-0.66, 0.60)                | -0.02 (-0.09, 0.06)                                      |
| PCB-195         | -137.73 (-259.57, -15.89)                   | -0.35 (-0.90, 0.21)                            | -0.54 (-1.24, 0.16)                | -0.05 (-0.14, 0.04)                                      |
| PCB-196         | -50.98 (-180.26, 78.31)                     | 0.05 (-0.58, 0.68)                             | 0.01 (-0.75, 0.77)                 | -0.05 (-0.14, 0.04)                                      |
| PCB-201         | -5.73 (-125.93, 114.48)                     | 0.28 (-0.31, 0.87)                             | -0.01 (-0.72, 0.70)                | -0.01 (-0.09, 0.08)                                      |
| PCB-206         | 5.49 (-90.44, 101.42)                       | 0.16 (-0.30, 0.63)                             | 0.06 (-0.51, 0.62)                 | 0.00 (-0.07, 0.07)                                       |

| <b>Chemical</b> | <b>Birth weight<sup>b</sup><br/>(grams)</b> | <b>Head circumference<sup>c</sup><br/>(cm)</b> | <b>Length<sup>d</sup><br/>(cm)</b> | <b>Ponderal Index<sup>d</sup><br/>(g/cm<sup>3</sup>)</b> |
|-----------------|---------------------------------------------|------------------------------------------------|------------------------------------|----------------------------------------------------------|
| PCB-209         | -98.88 (-187.14, -10.61)                    | -0.21 (-0.59, 0.16)                            | -0.28 (-0.80, 0.25)                | -0.03 (-0.09, 0.03)                                      |
| Et-PFOSA-AcOH   | 26.67 (-57.08, 110.43)                      | -0.21 (-0.62, 0.20)                            | 0.32 (-0.16, 0.80)                 | -0.02 (-0.08, 0.04)                                      |
| Me-PFOSA-AcOH   | -30.45 (-119.15, 58.25)                     | -0.07 (-0.45, 0.32)                            | -0.27 (-0.78, 0.25)                | 0.03 (-0.03, 0.09)                                       |
| PFDeA           | -1.75 (-90.56, 87.07)                       | 0.04 (-0.34, 0.42)                             | -0.24 (-0.76, 0.28)                | 0.03 (-0.03, 0.09)                                       |
| PFNA            | 62.66 (-32.05, 157.38)                      | 0.33 (-0.12, 0.77)                             | -0.17 (-0.74, 0.39)                | 0.07 (0.00, 0.13)                                        |
| PFOSA           | -104.23 (-194.16, -14.30)                   | 0.00 (-0.42, 0.42)                             | -0.44 (-0.95, 0.07)                | 0.02 (-0.04, 0.08)                                       |
| PFOS            | 37.51 (-73.45, 148.46)                      | 0.07 (-0.45, 0.60)                             | 0.22 (-0.43, 0.86)                 | 0.00 (-0.07, 0.08)                                       |
| PFOA            | 4.78 (-85.44, 95.01)                        | 0.18 (-0.25, 0.60)                             | -0.24 (-0.77, 0.29)                | 0.04 (-0.02, 0.10)                                       |

<sup>a</sup>Models are adjusted for maternal and paternal serum lipids, serum cotinine, BMI (kg/m<sup>2</sup>), maternal age, difference in parental age, infant gender, the individual and partner sum of remaining chemical concentrations in each chemical's respective class. <sup>b</sup>Data for 113 boys and 117 girls were available for analysis. <sup>c</sup>Data for 90 boys and 91 girls were available for analysis. <sup>d</sup>Data for 113 boys and 116 girls were available for analysis.

**Table S4.** Adjusted<sup>a</sup> mean changes ( $\beta$ ) and their 95% confidence intervals for each birth size measure among girls per 1-SD increase in ln-transformed paternal chemical concentrations for all chemicals evaluated, LIFE Study, 2005-2009.

| <b>Chemical</b>         | <b>Birth weight<sup>b</sup><br/>(grams)</b> | <b>Head circumference<sup>c</sup><br/>(cm)</b> | <b>Length<sup>d</sup><br/>(cm)</b> | <b>Ponderal Index<sup>d</sup><br/>(g/cm<sup>3</sup>)</b> |
|-------------------------|---------------------------------------------|------------------------------------------------|------------------------------------|----------------------------------------------------------|
| PBB 153                 | -51.07 (-131.63, 29.50)                     | -0.10 (-0.42, 0.23)                            | -0.26 (-0.74, 0.23)                | 0.00 (-0.06, 0.05)                                       |
| HCH                     | -23.54 (-113.46, 66.37)                     | 0.12 (-0.40, 0.63)                             | 0.00 (-0.53, 0.54)                 | -0.03 (-0.09, 0.04)                                      |
| $\beta$ -HCH            | 54.14 (-142.64, 250.93)                     | 0.23 (-0.68, 1.13)                             | 0.26 (-1.08, 1.61)                 | 0.00 (-0.15, 0.14)                                       |
| $\gamma$ -HCH (lindane) | -5.70 (-85.92, 74.52)                       | 0.05 (-0.29, 0.39)                             | -0.51 (-0.98, -0.04)               | 0.08 (0.02, 0.13)                                        |
| <i>o,p'</i> -DDT        | -49.28 (-153.83, 55.27)                     | -0.14 (-0.59, 0.32)                            | -0.18 (-0.81, 0.44)                | -0.02 (-0.09, 0.06)                                      |
| <i>p,p'</i> -DDT        | -18.67 (-157.94, 120.59)                    | -0.33 (-0.98, 0.32)                            | 0.19 (-0.69, 1.07)                 | -0.05 (-0.15, 0.05)                                      |
| Oxychlorthane           | -36.13 (-138.59, 66.33)                     | -0.19 (-0.71, 0.32)                            | -0.07 (-0.69, 0.54)                | -0.02 (-0.10, 0.05)                                      |
| <i>trans</i> -Nonachlor | -24.19 (-119.84, 71.45)                     | -0.36 (-1.05, 0.32)                            | -0.31 (-0.88, 0.25)                | 0.03 (-0.04, 0.10)                                       |
| <i>p,p'</i> -DDE        | 37.15 (-100.47, 174.77)                     | 0.09 (-0.56, 0.74)                             | -0.56 (-1.41, 0.28)                | 0.12 (0.02, 0.22)                                        |
| Mirex                   | -78.47 (-174.27, 17.33)                     | -0.30 (-0.90, 0.30)                            | -0.23 (-0.80, 0.33)                | -0.04 (-0.10, 0.03)                                      |
| PBDE-17                 | -61.41 (-184.28, 61.46)                     | -0.38 (-0.93, 0.18)                            | -0.48 (-1.20, 0.24)                | 0.02 (-0.07, 0.11)                                       |
| PBDE-28                 | -30.85 (-154.83, 93.14)                     | 0.02 (-0.57, 0.61)                             | -0.28 (-1.02, 0.46)                | 0.01 (-0.08, 0.10)                                       |
| PBDE-47                 | -7.26 (-180.19, 165.67)                     | 0.44 (-0.32, 1.21)                             | -0.51 (-1.55, 0.53)                | 0.07 (-0.06, 0.19)                                       |
| PBDE-66                 | -39.80 (-152.57, 72.96)                     | 0.10 (-0.39, 0.59)                             | 0.06 (-0.63, 0.75)                 | -0.04 (-0.13, 0.04)                                      |
| PBDE-85                 | 35.59 (-132.35, 203.53)                     | -0.01 (-0.83, 0.80)                            | 0.27 (-0.72, 1.26)                 | -0.03 (-0.15, 0.09)                                      |
| PBDE-99                 | 17.53 (-123.74, 158.80)                     | 0.10 (-0.52, 0.71)                             | 0.18 (-0.65, 1.01)                 | -0.02 (-0.12, 0.08)                                      |
| PBDE-100                | 44.62 (-99.10, 188.35)                      | -0.11 (-0.87, 0.64)                            | 0.08 (-0.78, 0.94)                 | 0.03 (-0.07, 0.13)                                       |
| PBDE-153                | 10.24 (-65.97, 86.45)                       | -0.06 (-0.46, 0.34)                            | 0.00 (-0.45, 0.45)                 | 0.01 (-0.04, 0.06)                                       |
| PBDE-154                | -37.34 (-197.47, 122.80)                    | -0.40 (-1.16, 0.36)                            | 0.08 (-0.86, 1.02)                 | -0.04 (-0.15, 0.08)                                      |
| PBDE-183                | -92.13 (-173.44, -10.82)                    | -0.19 (-0.56, 0.18)                            | -0.42 (-0.93, 0.08)                | -0.01 (-0.07, 0.05)                                      |
| PCB-28                  | -63.67 (-1069.02, 941.68)                   | 0.96 (-5.23, 7.15)                             | 0.21 (-5.96, 6.37)                 | -0.13 (-0.92, 0.66)                                      |
| PCB-44                  | -192.16 (-919.34, 535.02)                   | -0.38 (-4.27, 3.51)                            | -1.67 (-5.40, 2.05)                | 0.09 (-0.39, 0.57)                                       |
| PCB-49                  | -52.11 (-771.62, 667.40)                    | 0.28 (-3.52, 4.08)                             | -0.55 (-4.55, 3.46)                | 0.05 (-0.42, 0.53)                                       |
| PCB-52                  | -262.98 (-984.22, 458.26)                   | 0.68 (-2.51, 3.87)                             | -1.19 (-5.52, 3.13)                | -0.03 (-0.53, 0.47)                                      |
| PCB-66                  | 107.13 (-651.54, 865.80)                    | -0.44 (-4.83, 3.96)                            | 0.68 (-3.86, 5.22)                 | -0.06 (-0.64, 0.52)                                      |
| PCB-74                  | -38.24 (-335.74, 259.27)                    | -0.24 (-1.59, 1.11)                            | 0.00 (-1.80, 1.81)                 | -0.06 (-0.28, 0.15)                                      |

| <b>Chemical</b> | <b>Birth weight<sup>b</sup><br/>(grams)</b> | <b>Head circumference<sup>c</sup><br/>(cm)</b> | <b>Length<sup>d</sup><br/>(cm)</b> | <b>Ponderal Index<sup>d</sup><br/>(g/cm<sup>3</sup>)</b> |
|-----------------|---------------------------------------------|------------------------------------------------|------------------------------------|----------------------------------------------------------|
| PCB-87          | 20.66 (-103.41, 144.74)                     | -0.21 (-0.86, 0.45)                            | 0.25 (-0.49, 0.99)                 | -0.03 (-0.12, 0.06)                                      |
| PCB-99          | -43.71 (-131.38, 43.96)                     | -0.18 (-0.56, 0.20)                            | -0.24 (-0.82, 0.34)                | -0.01 (-0.07, 0.06)                                      |
| PCB-101         | 44.45 (-65.63, 154.53)                      | 0.15 (-0.35, 0.65)                             | 0.15 (-0.52, 0.81)                 | 0.01 (-0.06, 0.09)                                       |
| PCB-105         | -39.96 (-121.71, 41.78)                     | -0.21 (-0.56, 0.14)                            | -0.19 (-0.68, 0.31)                | -0.01 (-0.07, 0.04)                                      |
| PCB-110         | -15.08 (-131.61, 101.46)                    | -0.05 (-0.69, 0.59)                            | -0.29 (-1.02, 0.43)                | 0.04 (-0.04, 0.13)                                       |
| PCB-114         | -14.60 (-98.75, 69.55)                      | -0.20 (-0.58, 0.18)                            | -0.11 (-0.63, 0.41)                | 0.00 (-0.06, 0.06)                                       |
| PCB-118         | -28.78 (-110.84, 53.28)                     | -0.18 (-0.53, 0.17)                            | -0.12 (-0.62, 0.38)                | -0.01 (-0.07, 0.04)                                      |
| PCB-128         | -21.20 (-120.01, 77.61)                     | -0.18 (-0.61, 0.25)                            | 0.18 (-0.42, 0.77)                 | -0.05 (-0.12, 0.02)                                      |
| PCB-138         | -69.04 (-191.78, 53.71)                     | -0.32 (-0.86, 0.22)                            | 0.15 (-0.57, 0.88)                 | -0.09 (-0.18, 0.00)                                      |
| PCB-146         | -49.50 (-174.25, 75.25)                     | -0.23 (-0.80, 0.34)                            | 0.09 (-0.70, 0.88)                 | -0.06 (-0.16, 0.04)                                      |
| PCB-149         | 20.90 (-59.40, 101.20)                      | 0.00 (-0.35, 0.35)                             | 0.18 (-0.32, 0.69)                 | -0.01 (-0.07, 0.04)                                      |
| PCB-151         | 18.87 (-58.61, 96.35)                       | 0.02 (-0.32, 0.36)                             | 0.15 (-0.32, 0.63)                 | -0.01 (-0.07, 0.05)                                      |
| PCB-153         | -29.33 (-164.37, 105.70)                    | 0.06 (-0.59, 0.71)                             | 0.22 (-0.60, 1.04)                 | -0.06 (-0.16, 0.03)                                      |
| PCB-156         | -46.65 (-161.20, 67.90)                     | -0.12 (-0.64, 0.40)                            | 0.29 (-0.39, 0.97)                 | -0.08 (-0.16, -0.01)                                     |
| PCB-157         | -37.56 (-125.55, 50.43)                     | -0.06 (-0.46, 0.34)                            | -0.01 (-0.55, 0.52)                | -0.03 (-0.09, 0.04)                                      |
| PCB-167         | -97.49 (-187.45, -7.54)                     | -0.45 (-0.86, -0.03)                           | -0.57 (-1.12, -0.02)               | 0.00 (-0.06, 0.07)                                       |
| PCB-170         | -16.85 (-144.38, 110.67)                    | 0.25 (-0.36, 0.85)                             | 0.09 (-0.69, 0.87)                 | -0.02 (-0.11, 0.07)                                      |
| PCB-172         | -35.87 (-143.12, 71.38)                     | -0.02 (-0.50, 0.47)                            | -0.11 (-0.76, 0.54)                | -0.01 (-0.09, 0.07)                                      |
| PCB-177         | 15.63 (-74.88, 106.14)                      | 0.07 (-0.32, 0.45)                             | 0.13 (-0.41, 0.68)                 | -0.01 (-0.07, 0.05)                                      |
| PCB-178         | 70.33 (-38.91, 179.57)                      | 0.27 (-0.21, 0.75)                             | 0.36 (-0.31, 1.03)                 | 0.00 (-0.08, 0.08)                                       |
| PCB-180         | 25.63 (-104.68, 155.93)                     | 0.54 (-0.09, 1.17)                             | 0.10 (-0.67, 0.87)                 | 0.01 (-0.08, 0.10)                                       |
| PCB-183         | 11.91 (-83.74, 107.57)                      | 0.06 (-0.36, 0.48)                             | 0.18 (-0.40, 0.75)                 | -0.02 (-0.09, 0.05)                                      |
| PCB-187         | 41.54 (-64.22, 147.30)                      | 0.22 (-0.23, 0.67)                             | 0.19 (-0.44, 0.82)                 | 0.00 (-0.07, 0.07)                                       |
| PCB-189         | -5.46 (-103.37, 92.45)                      | 0.15 (-0.30, 0.61)                             | 0.16 (-0.42, 0.74)                 | -0.03 (-0.10, 0.04)                                      |
| PCB-194         | 15.68 (-72.06, 103.41)                      | 0.26 (-0.23, 0.75)                             | -0.11 (-0.63, 0.42)                | 0.03 (-0.03, 0.10)                                       |
| PCB-195         | -6.94 (-102.96, 89.07)                      | 0.38 (-0.09, 0.85)                             | -0.20 (-0.77, 0.37)                | 0.03 (-0.04, 0.10)                                       |
| PCB-196         | 4.37 (-81.70, 90.43)                        | 0.23 (-0.21, 0.66)                             | -0.06 (-0.57, 0.45)                | 0.02 (-0.04, 0.08)                                       |
| PCB-201         | 8.51 (-67.94, 84.96)                        | 0.19 (-0.22, 0.61)                             | -0.06 (-0.51, 0.39)                | 0.02 (-0.04, 0.07)                                       |
| PCB-206         | -3.35 (-75.62, 68.92)                       | 0.16 (-0.34, 0.66)                             | -0.06 (-0.49, 0.37)                | 0.01 (-0.04, 0.06)                                       |

| <b>Chemical</b> | <b>Birth weight<sup>b</sup><br/>(grams)</b> | <b>Head circumference<sup>c</sup><br/>(cm)</b> | <b>Length<sup>d</sup><br/>(cm)</b> | <b>Ponderal Index<sup>d</sup><br/>(g/cm<sup>3</sup>)</b> |
|-----------------|---------------------------------------------|------------------------------------------------|------------------------------------|----------------------------------------------------------|
| PCB-209         | -24.49 (-124.53, 75.56)                     | -0.04 (-0.84, 0.75)                            | -0.27 (-0.86, 0.32)                | 0.02 (-0.05, 0.09)                                       |
| Et-PFOSA-AcOH   | -53.65 (-146.41, 39.11)                     | -0.09 (-0.49, 0.31)                            | -0.04 (-0.57, 0.49)                | -0.04 (-0.10, 0.03)                                      |
| Me-PFOSA-AcOH   | 7.98 (-82.44, 98.39)                        | 0.17 (-0.24, 0.57)                             | 0.11 (-0.43, 0.64)                 | -0.01 (-0.07, 0.05)                                      |
| PFDeA           | -42.95 (-155.08, 69.17)                     | -0.16 (-0.65, 0.32)                            | 0.12 (-0.55, 0.79)                 | -0.06 (-0.14, 0.02)                                      |
| PFNA            | 5.15 (-96.09, 106.40)                       | 0.28 (-0.17, 0.72)                             | -0.19 (-0.79, 0.41)                | 0.02 (-0.05, 0.09)                                       |
| PFOSA           | 10.48 (-85.29, 106.26)                      | 0.07 (-0.34, 0.48)                             | 0.16 (-0.41, 0.72)                 | -0.01 (-0.07, 0.06)                                      |
| PFOS            | 38.58 (-59.29, 136.45)                      | 0.29 (-0.14, 0.71)                             | -0.05 (-0.62, 0.52)                | 0.05 (-0.02, 0.11)                                       |
| PFOA            | 19.82 (-69.37, 109.02)                      | -0.03 (-0.42, 0.36)                            | -0.27 (-0.79, 0.25)                | 0.06 (0.00, 0.12)                                        |

<sup>a</sup>Models are adjusted for maternal and paternal serum lipids, serum cotinine, BMI (kg/m<sup>2</sup>), maternal age, difference in parental age, infant gender, the individual and partner sum of remaining chemical concentrations in each chemical's respective class. <sup>b</sup>Data for 113 boys and 117 girls were available for analysis. <sup>c</sup>Data for 90 boys and 91 girls were available for analysis. <sup>d</sup>Data for 113 boys and 116 girls were available for analysis.

**Table S5.** Adjusted<sup>a</sup> mean changes ( $\beta$ ) and their 95% confidence intervals for each birth size measure among boys per 1-SD increase in ln-transformed paternal chemical concentrations for all chemicals evaluated, LIFE Study, 2005-2009.

| <b>Chemical</b>         | <b>Birth weight<sup>b</sup><br/>(grams)</b> | <b>Head circumference<sup>c</sup><br/>(cm)</b> | <b>Length<sup>d</sup><br/>(cm)</b> | <b>Ponderal Index<sup>d</sup><br/>(g/cm<sup>3</sup>)</b> |
|-------------------------|---------------------------------------------|------------------------------------------------|------------------------------------|----------------------------------------------------------|
| PBB 153                 | 5.09 (-88.77, 98.95)                        | -0.22 (-0.63, 0.19)                            | 0.14 (-0.40, 0.69)                 | -0.02 (-0.09, 0.04)                                      |
| HCH                     | 2.99 (-118.93, 124.90)                      | 0.18 (-0.40, 0.77)                             | 0.37 (-0.35, 1.09)                 | -0.06 (-0.14, 0.03)                                      |
| $\beta$ -HCH            | 9.79 (-75.51, 95.09)                        | -0.16 (-0.78, 0.46)                            | 0.25 (-0.23, 0.74)                 | -0.03 (-0.09, 0.03)                                      |
| $\gamma$ -HCH (lindane) | 53.22 (-38.14, 144.58)                      | 0.28 (-0.11, 0.67)                             | 0.33 (-0.20, 0.86)                 | 0.00 (-0.07, 0.06)                                       |
| <i>o,p'</i> -DDT        | 4.32 (-86.15, 94.79)                        | 0.20 (-0.28, 0.67)                             | 0.01 (-0.51, 0.54)                 | -0.01 (-0.07, 0.06)                                      |
| <i>p,p'</i> -DDT        | -22.30 (-126.22, 81.62)                     | -0.29 (-0.82, 0.25)                            | 0.28 (-0.31, 0.87)                 | -0.06 (-0.13, 0.01)                                      |
| Oxychlorane             | -85.01 (-197.25, 27.22)                     | -0.35 (-0.84, 0.14)                            | -0.19 (-0.85, 0.47)                | -0.02 (-0.10, 0.06)                                      |
| <i>trans</i> -Nonachlor | -71.88 (-176.24, 32.48)                     | -0.27 (-0.72, 0.19)                            | -0.37 (-0.98, 0.24)                | 0.02 (-0.06, 0.09)                                       |
| <i>p,p'</i> -DDE        | 16.02 (-81.58, 113.62)                      | -0.02 (-0.51, 0.46)                            | 0.12 (-0.45, 0.69)                 | 0.01 (-0.06, 0.07)                                       |
| Mirex                   | -26.39 (-181.53, 128.75)                    | -0.12 (-0.84, 0.59)                            | 0.14 (-0.74, 1.01)                 | -0.06 (-0.17, 0.05)                                      |
| PBDE-17                 | 34.49 (-95.05, 164.03)                      | -0.17 (-0.78, 0.43)                            | 0.12 (-0.62, 0.86)                 | 0.00 (-0.09, 0.09)                                       |
| PBDE-28                 | 14.99 (-99.94, 129.93)                      | 0.18 (-0.33, 0.69)                             | 0.00 (-0.67, 0.67)                 | 0.00 (-0.08, 0.09)                                       |
| PBDE-47                 | 40.96 (-84.42, 166.34)                      | 0.48 (-0.07, 1.03)                             | -0.22 (-0.96, 0.52)                | 0.06 (-0.02, 0.15)                                       |
| PBDE-66                 | -47.85 (-173.89, 78.19)                     | 0.33 (-0.26, 0.92)                             | 0.03 (-0.70, 0.77)                 | -0.04 (-0.13, 0.04)                                      |
| PBDE-85                 | 95.17 (-89.91, 280.25)                      | 0.16 (-0.76, 1.09)                             | 0.51 (-0.56, 1.58)                 | -0.02 (-0.15, 0.11)                                      |
| PBDE-99                 | 59.43 (-90.47, 209.33)                      | 0.31 (-0.38, 0.99)                             | 0.44 (-0.43, 1.31)                 | -0.03 (-0.13, 0.07)                                      |
| PBDE-100                | 54.63 (-58.07, 167.33)                      | 0.00 (-0.51, 0.51)                             | 0.09 (-0.57, 0.75)                 | 0.04 (-0.04, 0.12)                                       |
| PBDE-153                | 69.68 (-52.31, 191.66)                      | 0.08 (-0.46, 0.62)                             | 0.29 (-0.40, 0.99)                 | 0.03 (-0.05, 0.12)                                       |
| PBDE-154                | 15.79 (-185.14, 216.72)                     | -0.30 (-1.29, 0.68)                            | 0.25 (-0.92, 1.42)                 | -0.02 (-0.16, 0.12)                                      |
| PBDE-183                | 21.32 (-85.27, 127.91)                      | 0.03 (-0.45, 0.51)                             | 0.30 (-0.32, 0.92)                 | -0.02 (-0.10, 0.05)                                      |
| PCB-28                  | 30.99 (-41.13, 103.11)                      | 0.14 (-0.16, 0.44)                             | -0.12 (-0.54, 0.31)                | 0.05 (0.00, 0.10)                                        |
| PCB-44                  | 28.59 (-43.21, 100.39)                      | 0.12 (-0.18, 0.42)                             | -0.12 (-0.54, 0.30)                | 0.04 (-0.01, 0.09)                                       |
| PCB-49                  | 27.27 (-45.01, 99.55)                       | 0.14 (-0.17, 0.45)                             | -0.13 (-0.56, 0.29)                | 0.04 (-0.01, 0.10)                                       |
| PCB-52                  | 25.95 (-46.29, 98.20)                       | 0.12 (-0.19, 0.42)                             | -0.13 (-0.56, 0.29)                | 0.04 (-0.01, 0.09)                                       |
| PCB-66                  | 32.51 (-40.66, 105.68)                      | 0.13 (-0.18, 0.44)                             | -0.11 (-0.54, 0.32)                | 0.04 (-0.01, 0.10)                                       |
| PCB-74                  | 39.33 (-37.79, 116.44)                      | 0.14 (-0.19, 0.47)                             | -0.03 (-0.48, 0.42)                | 0.04 (-0.02, 0.09)                                       |

| <b>Chemical</b> | <b>Birth weight<sup>b</sup><br/>(grams)</b> | <b>Head circumference<sup>c</sup><br/>(cm)</b> | <b>Length<sup>d</sup><br/>(cm)</b> | <b>Ponderal Index<sup>d</sup><br/>(g/cm<sup>3</sup>)</b> |
|-----------------|---------------------------------------------|------------------------------------------------|------------------------------------|----------------------------------------------------------|
| PCB-87          | 37.52 (-53.17, 128.21)                      | 0.01 (-0.52, 0.54)                             | 0.33 (-0.20, 0.87)                 | -0.03 (-0.09, 0.04)                                      |
| PCB-99          | 44.48 (-85.64, 174.59)                      | 0.15 (-0.45, 0.74)                             | 0.02 (-0.75, 0.80)                 | 0.03 (-0.06, 0.13)                                       |
| PCB-101         | 57.87 (-58.43, 174.16)                      | 0.20 (-0.40, 0.80)                             | 0.12 (-0.57, 0.81)                 | 0.03 (-0.05, 0.11)                                       |
| PCB-105         | 26.19 (-101.10, 153.49)                     | -0.15 (-1.08, 0.78)                            | 0.35 (-0.40, 1.10)                 | -0.03 (-0.12, 0.06)                                      |
| PCB-110         | 41.50 (-123.29, 40.29)                      | -0.03 (-0.66, 0.59)                            | -0.18 (-0.67, 0.30)                | -0.01 (-0.06, 0.05)                                      |
| PCB-114         | 25.45 (-96.26, 147.16)                      | -0.14 (-0.74, 0.45)                            | 0.68 (-0.03, 1.39)                 | -0.09 (-0.17, 0.00)                                      |
| PCB-118         | 44.57 (-100.62, 189.77)                     | 0.08 (-0.75, 0.91)                             | 0.43 (-0.42, 1.28)                 | -0.03 (-0.13, 0.07)                                      |
| PCB-128         | -68.82 (-189.49, 51.85)                     | -0.66 (-1.31, -0.01)                           | 0.13 (-0.58, 0.84)                 | -0.07 (-0.16, 0.01)                                      |
| PCB-138         | -103.02 (-264.04, 57.99)                    | -0.56 (-1.30, 0.17)                            | 0.28 (-0.68, 1.23)                 | -0.13 (-0.24, -0.02)                                     |
| PCB-146         | -85.33 (-241.25, 70.59)                     | -0.49 (-1.18, 0.20)                            | -0.06 (-0.99, 0.87)                | -0.06 (-0.17, 0.06)                                      |
| PCB-149         | 11.81 (-463.98, 487.61)                     | -1.94 (-6.04, 2.16)                            | 0.46 (-2.32, 3.24)                 | -0.08 (-0.41, 0.26)                                      |
| PCB-151         | 144.27 (-316.51, 605.06)                    | -1.04 (-5.25, 3.17)                            | 0.26 (-2.45, 2.97)                 | 0.07 (-0.25, 0.39)                                       |
| PCB-153         | -68.77 (-226.45, 88.91)                     | -0.24 (-1.02, 0.54)                            | 0.07 (-0.88, 1.01)                 | -0.06 (-0.18, 0.05)                                      |
| PCB-156         | -74.83 (-198.26, 48.59)                     | -0.22 (-0.79, 0.36)                            | 0.39 (-0.33, 1.11)                 | -0.11 (-0.20, -0.03)                                     |
| PCB-157         | -102.66 (-206.35, 1.03)                     | -0.54 (-1.01, -0.06)                           | 0.07 (-0.55, 0.68)                 | -0.08 (-0.16, -0.01)                                     |
| PCB-167         | -38.24 (-139.86, 63.37)                     | -0.32 (-0.80, 0.16)                            | -0.11 (-0.70, 0.49)                | 0.00 (-0.07, 0.07)                                       |
| PCB-170         | -119.29 (-268.37, 29.79)                    | -0.27 (-0.97, 0.43)                            | -0.38 (-1.26, 0.51)                | -0.03 (-0.14, 0.07)                                      |
| PCB-172         | -166.89 (-311.19, -22.60)                   | -0.63 (-1.28, 0.02)                            | -0.67 (-1.53, 0.18)                | -0.03 (-0.13, 0.07)                                      |
| PCB-177         | -70.92 (-325.22, 183.39)                    | -0.37 (-1.73, 0.99)                            | -0.39 (-1.89, 1.11)                | 0.01 (-0.17, 0.19)                                       |
| PCB-178         | 58.16 (-98.32, 214.64)                      | -0.26 (-0.99, 0.46)                            | 0.13 (-0.80, 1.06)                 | 0.03 (-0.08, 0.14)                                       |
| PCB-180         | -53.71 (-205.47, 98.06)                     | 0.02 (-0.72, 0.76)                             | -0.36 (-1.25, 0.53)                | 0.02 (-0.09, 0.12)                                       |
| PCB-183         | -46.98 (-267.32, 173.36)                    | -0.50 (-1.57, 0.57)                            | -0.40 (-1.69, 0.88)                | 0.02 (-0.14, 0.18)                                       |
| PCB-187         | 21.30 (-165.91, 208.50)                     | -0.20 (-1.00, 0.61)                            | -0.24 (-1.25, 0.78)                | 0.05 (-0.08, 0.17)                                       |
| PCB-189         | -45.93 (-140.98, 49.12)                     | -0.27 (-0.70, 0.15)                            | 0.23 (-0.33, 0.79)                 | -0.06 (-0.13, 0.01)                                      |
| PCB-194         | -45.93 (-187.59, 95.74)                     | -0.28 (-0.93, 0.37)                            | -0.40 (-1.23, 0.43)                | 0.03 (-0.07, 0.13)                                       |
| PCB-195         | -148.39 (-281.69, -15.08)                   | -0.21 (-0.84, 0.43)                            | -0.65 (-1.43, 0.13)                | -0.02 (-0.11, 0.08)                                      |
| PCB-196         | -52.35 (-217.56, 112.86)                    | -0.37 (-1.12, 0.39)                            | -0.50 (-1.47, 0.47)                | 0.05 (-0.07, 0.16)                                       |
| PCB-201         | -0.68 (-169.89, 168.54)                     | -0.32 (-1.08, 0.44)                            | -0.43 (-1.42, 0.56)                | 0.07 (-0.05, 0.19)                                       |
| PCB-206         | 8.76 (-163.09, 180.61)                      | -0.38 (-1.17, 0.41)                            | -0.02 (-1.02, 0.98)                | 0.01 (-0.11, 0.13)                                       |

| <b>Chemical</b> | <b>Birth weight<sup>b</sup><br/>(grams)</b> | <b>Head circumference<sup>c</sup><br/>(cm)</b> | <b>Length<sup>d</sup><br/>(cm)</b> | <b>Ponderal Index<sup>d</sup><br/>(g/cm<sup>3</sup>)</b> |
|-----------------|---------------------------------------------|------------------------------------------------|------------------------------------|----------------------------------------------------------|
| PCB-209         | -0.80 (-115.85, 114.24)                     | -0.35 (-0.88, 0.17)                            | 0.10 (-0.58, 0.78)                 | -0.01 (-0.09, 0.07)                                      |
| Et-PFOSA-AcOH   | 29.10 (-64.65, 122.85)                      | -0.41 (-1.03, 0.21)                            | 0.51 (-0.05, 1.07)                 | -0.07 (-0.16, 0.03)                                      |
| Me-PFOSA-AcOH   | -17.27 (-105.41, 70.87)                     | 0.12 (-0.27, 0.51)                             | -0.20 (-0.71, 0.32)                | 0.02 (-0.05, 0.08)                                       |
| PFDeA           | 23.65 (-64.15, 111.45)                      | -0.13 (-0.51, 0.26)                            | -0.14 (-0.65, 0.37)                | 0.02 (-0.04, 0.09)                                       |
| PFNA            | 54.08 (-41.11, 149.28)                      | 0.15 (-0.28, 0.58)                             | -0.12 (-0.69, 0.44)                | 0.05 (-0.02, 0.11)                                       |
| PFOSA           | -73.76 (-154.43, 6.91)                      | 0.01 (-0.45, 0.47)                             | 0.01 (-0.46, 0.49)                 | -0.06 (-0.11, 0.00)                                      |
| PFOS            | 36.85 (-73.14, 146.84)                      | 0.16 (-0.37, 0.68)                             | -0.20 (-0.84, 0.43)                | 0.06 (-0.02, 0.13)                                       |
| PFOA            | -11.04 (-112.32, 90.23)                     | -0.04 (-0.52, 0.43)                            | -0.26 (-0.86, 0.34)                | 0.03 (-0.04, 0.10)                                       |

<sup>a</sup>Models are adjusted for maternal and paternal serum lipids, serum cotinine, BMI (kg/m<sup>2</sup>), maternal age, difference in parental age, infant gender, the individual and partner sum of remaining chemical concentrations in each chemical's respective class. <sup>b</sup>Data for 113 boys and 117 girls were available for analysis. <sup>c</sup>Data for 90 boys and 91 girls were available for analysis. <sup>d</sup>Data for 113 boys and 116 girls were available for analysis.
